# Supplementary material for: Macrocyclic peptides that inhibit Wnt signallingviainteraction with Wnt3a
Source: Royal Society of Chemistry journal article supplement (doi:10.1039/d0cb00016g), 2020-01-01
Supplement: d0cb00016g2.xlsx [file d0cb00016g2.xlsx]

## Sheet: Figure 3 Data
	Luciferase Reporter Raw Data
		AFM, no peptide	Wnt3a/AFM, no peptide	Wnt3a/AFM, 1 μM WAp-D02	Wnt3a/AFM, 1 μM WAp-D04	Wnt3a/AFM, 1 μM WAp-D11	Wnt3a/AFM, 1 μM WAp-L05
	n=1	770	1530	1594	828	1532	1424
	n=2	702	1480	1700	716	1322	1590
	n=3	744	1638	1604	860	1404	1420
	n=4	876	1562	1948	724	1430	1660
	Average	773	1552.5	1711.5	782	1422	1523.5
	Standard Error (SE)	37.081	33.1197	82.3747	36.4234	43.2897	60.3234
	Fold Value	0.497907	1	1.10242	0.503704	0.915942	0.98132
	Fold_SE	0.0238847	0.0213332	0.0530594	0.0234612	0.0278839	0.0388557
	Average blank-subtracted Data
		AFM, no peptide	Wnt3a/AFM, no peptide	Wnt3a/AFM, 1 μM WAp-D02	Wnt3a/AFM, 1 μM WAp-D04	Wnt3a/AFM, 1 μM WAp-D11	Wnt3a/AFM, 1 μM WAp-L05
	n=1	770	757	821	55	759	651
	n=2	702	707	927	-57	549	817
	n=3	744	865	831	87	631	647
	n=4	876	789	1175	-49	657	887
	Average	773	779.5	938.5	9	649	750.5
	Standard Error (SE)	37.081	33.1197	82.3747	36.4234	43.2897	60.3234
	Fold Value	0.991661	1	1.20398	0.0115459	0.832585	0.962797
	Fold_SE	0.0475702	0.0424884	0.105676	0.0467267	0.0555352	0.0773873

## Sheet: Figure 5a Data
	Luciferase Reporter Raw Data
		10 nM AFM, no peptide	10 nM Wnt3a-AFM, no peptide	10 nM Wnt3a-AFM, 160 nM WAp-D04	10 nM Wnt3a-AFM, 1600 nM WAp-D04	10 nM Wnt3a-AFM, 160 nM WAp-D04-W10P	10 nM Wnt3a-AFM, 1600 nM WAp-D04-W10P	10 nM Wnt3a-AFM, 160 nM WAp-D04-W10P/R2K	10 nM Wnt3a-AFM, 1600 nM WAp-D04-W10P/R2K	10 nM Wnt3a-AFM, 160 nM WAp-D04-W10P/K3I	10 nM Wnt3a-AFM, 1600 nM WAp-D04-W10P/K3I	10 nM Wnt3a-AFM, 160 nM WAp-D04-W10P/K3R	10 nM Wnt3a-AFM, 1600 nM WAp-D04-W10P/K3R	10 nM Wnt3a-AFM, 160 nM WAp-D04-W10P/K3T	10 nM Wnt3a-AFM, 1600 nM WAp-D04-W10P/K3T	10 nM Wnt3a-AFM, 160 nM WAp-D04-W10P/R2K/K3V	10 nM Wnt3a-AFM, 1600 nM WAp-D04-W10P/R2K/K3V
	n=1	1158	2742	2370	1490	1716	1152	1784	1086	1802	1066	2060	1176	1858	1196	2022	1126
	n=2	1184	2680	2440	1470	1858	1076	1896	1168	1900	1096	1998	1212	2008	1048	2050	1126
	n=3	1190	2896	2374	1480	1546	1138	1768	1108	1824	1268	2060	1310	2048	1216	2136	1088
	n=4	1214	2960	2498	1432	1760	1240	1754	1098	1914	1268	2038	1124	2020	1142	2026	1212
	Average	1186.5	2819.5	2420.5	1468	1720	1151.5	1800.5	1115	1860	1174.5	2039	1205.5	1983.5	1150.5	2058.5	1138
	Standard Error (SE)	11.5	65.2297	30.4124	12.6754	65.1511	33.8071	32.4178	18.23	27.6526	54.3285	14.6173	39.2375	42.6644	37.571	26.5628	26.2425
	Fold Value	0.420819	1	0.858486	0.52066	0.610037	0.408406	0.638588	0.39546	0.659691	0.416563	0.723178	0.427558	0.703494	0.408051	0.730094	0.403618
	Fold_SE	0.00407874	0.0549766	0.0256321	0.010683	0.0549103	0.0284931	0.0273222	0.0153645	0.023306	0.0457889	0.0123197	0.03307	0.0359582	0.0316654	0.0223875	0.0221175
	Average blank-subtracted Data
		10 nM AFM, no peptide	10 nM Wnt3a-AFM, no peptide	10 nM Wnt3a-AFM, 160 nM WAp-D04	10 nM Wnt3a-AFM, 1600 nM WAp-D04	10 nM Wnt3a-AFM, 160 nM WAp-D04-W10P	10 nM Wnt3a-AFM, 1600 nM WAp-D04-W10P	10 nM Wnt3a-AFM, 160 nM WAp-D04-W10P/R2K	10 nM Wnt3a-AFM, 1600 nM WAp-D04-W10P/R2K	10 nM Wnt3a-AFM, 160 nM WAp-D04-W10P/K3I	10 nM Wnt3a-AFM, 1600 nM WAp-D04-W10P/K3I	10 nM Wnt3a-AFM, 160 nM WAp-D04-W10P/K3R	10 nM Wnt3a-AFM, 1600 nM WAp-D04-W10P/K3R	10 nM Wnt3a-AFM, 160 nM WAp-D04-W10P/K3T	10 nM Wnt3a-AFM, 1600 nM WAp-D04-W10P/K3T	10 nM Wnt3a-AFM, 160 nM WAp-D04-W10P/R2K/K3V	10 nM Wnt3a-AFM, 1600 nM WAp-D04-W10P/R2K/K3V
	n=1	1158	1555.5	1183.5	303.5	529.5	-34.5	597.5	-100.5	615.5	-120.5	873.5	-10.5	671.5	9.5	835.5	-60.5
	n=2	1184	1493.5	1253.5	283.5	671.5	-110.5	709.5	-18.5	713.5	-90.5	811.5	25.5	821.5	-138.5	863.5	-60.5
	n=3	1190	1709.5	1187.5	293.5	359.5	-48.5	581.5	-78.5	637.5	81.5	873.5	123.5	861.5	29.5	949.5	-98.5
	n=4	1214	1773.5	1311.5	245.5	573.5	53.5	567.5	-88.5	727.5	81.5	851.5	-62.5	833.5	-44.5	839.5	25.5
	Average	1186.5	1633	1234	281.5	533.5	-35	614	-71.5	673.5	-12	852.5	19	797	-36	872	-48.5
	Standard Error (SE)	11.5	65.2297	30.4124	12.6754	65.1511	33.8071	32.4178	18.23	27.6526	54.3285	14.6173	39.2375	42.6644	37.571	26.5628	26.2425
	Fold Value	0.726577	1	0.755664	0.172382	0.326699	-0.0214329	0.375995	-0.0437844	0.412431	-0.00734844	0.522045	0.011635	0.488059	-0.0220453	0.533987	-0.0296999
	Fold_SE	0.00704225	0.0399447	0.0186237	0.00776205	0.0398966	0.0207024	0.0198517	0.0111635	0.0169336	0.0332691	0.00895122	0.0240279	0.0261264	0.0230074	0.0162663	0.0160701
